# Supplementary material for: Nano-Antagonist Alleviates Inflammation and Allows for MRI of Atherosclerosis
Source: PubMed Central journal article supplement (PMC6838142; doi:10.7150/ntno.37391), 2019-11-01
Supplement: ntnov03p0342s1.pdf [file ntnov03p0342s1.pdf]

**Supplementary Table S1.** Reagents and resources used.

| Reagent or resource (abbreviation)                                 | Obtained from (vendor) | Catalog number |
|--------------------------------------------------------------------|------------------------|----------------|
| DSPE-PEG(2000) Carboxylic Acid (DSPE-PEG-CO <sub>2</sub> H)        | Avanti Polar Lipids    | 880135P        |
| DSPE-PEG(2000) Maleimide (DSPE-PEG-MAL)                            | Avanti Polar Lipids    | 880135P        |
| 18:1 Liss Rhod PE (Rhodamine-PE)                                   | Avanti Polar Lipids    | 810150P        |
| 18:0 PE-DTPA (Gd)                                                  | Avanti Polar Lipids    | 791275         |
| trFluor™ Eu-Cryptate succinimidyl ester                            | Aat Bioquest           | 1430           |
| N-(3-Dimethylaminopropyl)-N'-ethylcarbodiimide hydrochloride (EDC) | Sigma Aldrich          | E6383          |
| N-Hydroxysulfosuccinimide sodium salt (sulfo-NHS)                  | Sigma Aldrich          | 56485          |
| 2-Mercaptoethanol                                                  | Sigma Aldrich          | M6250          |
| Hydroxylamine hydrochloride (NH <sub>2</sub> OH)                   | Sigma Aldrich          | 379921         |
| Sepharose 4B                                                       | Sigma Aldrich          | 4B200          |
| RAW-Blue™ Cells                                                    | Invivogen              | raw-sp         |
| Dexamethasone (Dex)                                                | MP Biomedicals         | 02150154-CF    |
| N-Acetyl-L-cysteine (NAC)                                          | Sigma Aldrich          | A9165          |
| Nunc MaxiSorp 96-well plates                                       | Thermo Fisher          | 44-2404-21     |
| CCR2 (Human) Recombinant Protein                                   | Abnova                 | H00729230-G01  |
| Recombinant Human CCL2/MCP-1 Protein                               | R&D Systems            | 279-MC-050     |
| Recombinant Mouse CCL2/MCP-1 Protein                               | R&D Systems            | 479-JE-010     |
| Liberase                                                           | Roche                  | 5401119001     |
| Deoxyribonuclease I (Dnase I)                                      | Roche                  | 04536282001    |
| Hyaluronidase                                                      | Sigma Aldrich          | H3506          |
| Lympholyte-M                                                       | Cedarlane              | CL5030         |
| RPMI-1640                                                          | Thermo Fisher          | 11875085       |
| Fetal Bovine Serum (FBS)                                           | Gemini Bio-Products    | 100-106        |
| 1,4-Dithiothreitol (DTT)                                           | Roche                  | 11583786001    |
| Bio Rad TGX Criterion precast gels                                 | Bio Rad                | 5671083        |

**Supplementary Table S1 (continuation)**

| <b>Reagent or resource (abbreviation)</b>                                                                  | <b>Obtained from (vendor)</b> | <b>Catalog number</b> |
|------------------------------------------------------------------------------------------------------------|-------------------------------|-----------------------|
| AquaBlock                                                                                                  | EastCoast Bio, Inc.           | PP82                  |
| SIGMAFAST OPD                                                                                              | Sigma Aldrich                 | P9187-5SET            |
| RAW 264.7 cells                                                                                            | ATCC                          | TIB-71                |
| J774A.1 cells                                                                                              | ATCC                          | TIB-67                |
| Mouse Interleukin-1 $\beta$ (IL-1 $\beta$ ) AlphaLISA Detection Kit                                        | Perkin Elmer                  | a1503c                |
| TNF $\alpha$ (mouse) AlphaLISA Detection Kit                                                               | Perkin Elmer                  | a1505c                |
| Streptavidin-HRP                                                                                           | Thermo Fisher                 | 21132                 |
| anti-NLRP3/NALP3, used at 1:5000 for Western blot                                                          | Adipogen                      | AG-20B-0014-C100      |
| anti-Caspase-1 (p10), used at 1:500 for Western blot                                                       | Adipogen                      | AG-20B-0044-C100      |
| Biotin anti-human MCP-1 Antibody                                                                           | BioLegend, Inc.               | 502609                |
| Anti-F4/80 antibody [Cl:A3-1] (ab6640), used at 1:250 for IHC                                              | Abcam                         | ab6640                |
| Cleaved Caspase-1, used at 1:1000 for Western blot                                                         | Cell Signalling               | 67314S                |
| GAPDH-HRP, used at 1:2000 for Western blot                                                                 | Cell Signalling               | 8884S                 |
| IL-1-Beta, used at 1:5000 for Western blot                                                                 | Cell Signalling               | 31202S                |
| Caspase-3, used at 1:1000 for Western blot                                                                 | Cell Signalling               | 14220S                |
| HO-1, used at 1:10,000 for Western blot                                                                    | Cell Signalling               | 82206S                |
| ASC/TMS1, used at 1:1000 for Western blot                                                                  | Cell Signalling               | 67824T                |
| beta Actin Polyclonal Antibody, used at 1:30,000 for Western blot                                          | Thermo Fisher                 | PA1-16889             |
| CD11b, used at 1 $\mu$ L per 10 <sup>6</sup> cells in flow cytometry                                       | BioLegend, Inc.               | 101211                |
| CD11c used at 1 $\mu$ L per 10 <sup>6</sup> cells in flow cytometry                                        | BioLegend, Inc.               | 117321                |
| CCR2 used at 1 $\mu$ L per 10 <sup>6</sup> cells in flow cytometry                                         | BioLegend, Inc.               | 150609                |
| Ly6C used at 1 $\mu$ L per 10 <sup>6</sup> cells in flow cytometry                                         | BioLegend, Inc.               | 128021                |
| Goat anti-Mouse IgG (H+L), Superclonal Recombinant Secondary Antibody, HRP, at 1:50,000 for Western blot   | Thermo Fisher                 | A28177                |
| Goat anti-Rabbit IgG (H+L), Superclonal™ Recombinant Secondary Antibody, HRP, at 1:50,000 for Western blot | Thermo Fisher                 | A27036                |
| $\mu$ -Slide Chemotaxis                                                                                    | IBIDI                         | 80326                 |
| ibidi Heating System                                                                                       | IBIDI                         | 10918                 |

**Supplementary Table S1 (continuation)**

| <b>Reagent or resource (abbreviation)</b>                 | <b>Obtained from (vendor)</b> | <b>Catalog number</b> |
|-----------------------------------------------------------|-------------------------------|-----------------------|
| Alexa Fluor 633 Phalloidin                                | Thermo Fisher                 | A22284                |
| Qiagen RNeasy Mini Kit                                    | Qiagen                        | 74104                 |
| High-Capacity cDNA Reverse Transcription Kit              | Thermo Fisher                 | 4368814               |
| Mrc1 TaqMan                                               | Thermo Fisher                 | Mm01329632_m1         |
| Nos2 TaqMan                                               | Thermo Fisher                 | Mm00440502_m1         |
| IL6 TaqMan                                                | Thermo Fisher                 | Mm00446190_m1         |
| TNF TaqMan                                                | Thermo Fisher                 | Mm00443258_m1         |
| IL1b TaqMan                                               | Thermo Fisher                 | Mm00434228_m1         |
| Teklad Custom Diet                                        | ENVIGO                        | TD.02028              |
| Alfalfa-free diet                                         | ENVIGO                        | TD.97184              |
| DAB Peroxidase (HRP) Substrate Kit                        | Vactor Labs                   | SK-4100               |
| Nigericin                                                 | Invivogen                     | tIrl-nig              |
| Adenosine 5'-triphosphate (ATP)                           | Sigma Aldrich                 | A1852                 |
| nCounter Inflammation Panel                               | Nanostring                    | XT-CSO-MIN2-12        |
| Mouse Cytokine Array - Eve Technologies                   | EVE technologies              | MD31                  |
| GSH/GSSG-Glo Assay                                        | Promega                       | V6611                 |
| DCFDA / H2DCFDA - Cellular ROS Assay Kit                  | Abcam                         | ab113851              |
| LDH-Glo Cytotoxicity Assay                                | Promega                       | J2380                 |
| B6.129P2-Apoe <sup>tm1Unc</sup> /J mice                   | The Jackson Laboratory        | Stock No: 002052      |
| B6.129S4-Ccr2 <sup>tm1Ifc</sup> /J mice                   | The Jackson Laboratory        | Stock No: 004999      |
| BMS CCR2 22                                               | Tocris                        | Cat. No. 3129         |
| ULTRA PURE LPS from <i>Salmonella minnesota</i> R595 (Re) | List Biological Laboratories  | 434                   |
| ACK lysis buffer                                          | Thermo Fisher                 | A1049201              |

**Supplementary Table S2.** Peptides Scanned from Original Protein.MKVSAALLCLLLIAATFIPQGLAQPDAINAPVTCCYNFTNRKISVQRLASYRRITSSKCPKEAVIFKTIVAKEICADP  
KQKWVQDSMDHLDKQTQTPKT

| <b>Peptide Sequence</b> | <b>SVM score</b> | <b>Prediction</b> | <b>Hydrophobicity</b> | <b>Hydropathicity</b> | <b>Hydrophilicity</b> | <b>Charge</b> | <b>Mol wt</b> |
|-------------------------|------------------|-------------------|-----------------------|-----------------------|-----------------------|---------------|---------------|
| <u>RLAS</u>             | -0.77            | AHT               | -0.31                 | 0.07                  | 0.25                  | 1             | 445.55        |
| <u>KVSA</u>             | -0.74            | AHT               | -0.14                 | 0.33                  | 0.33                  | 1             | 403.52        |
| <u>LLIA</u>             | -0.71            | AHT               | 0.51                  | 3.48                  | -1.48                 | 0             | 428.6         |
| <u>KISV</u>             | -0.65            | AHT               | -0.02                 | 1                     | 0                     | 1             | 445.6         |
| <b><u>VTCC</u></b>      | <b>-0.64</b>     | <b>AHT</b>        | <b>0.11</b>           | <b>2.12</b>           | <b>-0.97</b>          | <b>0</b>      | <b>424.57</b> |
| <u>KTIV</u>             | -0.64            | AHT               | 0                     | 1.03                  | -0.17                 | 1             | 459.63        |
| <u>DKQT</u>             | -0.64            | AHT               | -0.67                 | -2.9                  | 1.45                  | 0             | 490.56        |
| <u>IVAK</u>             | -0.62            | AHT               | 0.1                   | 1.65                  | -0.2                  | 1             | 429.6         |
| <u>HLDK</u>             | -0.62            | AHT               | -0.42                 | -1.7                  | 0.93                  | 0             | 511.62        |
| <u>ALLC</u>             | -0.56            | AHT               | 0.34                  | 2.97                  | -1.27                 | 0             | 418.58        |
| <u>QDSM</u>             | -0.55            | AHT               | -0.35                 | -1.48                 | 0.55                  | -1            | 479.55        |
| <u>LLLI</u>             | -0.54            | AHT               | 0.58                  | 3.97                  | -1.8                  | 0             | 470.68        |
| <u>MKVS</u>             | -0.53            | AHT               | -0.14                 | 0.35                  | 0.12                  | 1             | 463.64        |
| <u>MDHL</u>             | -0.53            | AHT               | -0.08                 | -0.25                 | -0.15                 | -1            | 514.64        |

**Supplementary Table S3.** Physico-chemical properties of synthesized nanoparticles.

| <b>NP ID</b> | <b>Conjugated Peptide</b> | <b>Conjugation end N-Term or SH type</b> | <b>Size (Mean Z average), nm</b> | <b>Size Standard Deviation</b> | <b>Mean Polydispersity Index (PDI)</b> |
|--------------|---------------------------|------------------------------------------|----------------------------------|--------------------------------|----------------------------------------|
| A1           | RLAS                      | N                                        | 93                               | 11                             | 0.198                                  |
| A2           | KVSA                      | N                                        | 110                              | 32                             | 0.124                                  |
| A3           | LLIA                      | N                                        | 134                              | 42                             | 0.162                                  |
| A4           | KISV                      | N                                        | 114                              | 42                             | 0.09                                   |
| A5           | VTCC                      | N                                        | 76                               | 10                             | 0.141                                  |
| A6           | KTIV                      | N                                        | 142                              | 32                             | 0.054                                  |
| B1           | DKQT                      | N                                        | 204                              | 54                             | 0.176                                  |
| B2           | IVAK                      | N                                        | 53                               | 5                              | 0.058                                  |
| B3           | HLDK                      | N                                        | 61                               | 12                             | 0.257                                  |
| B4           | ALLC                      | N                                        | 86                               | 14                             | 0.151                                  |
| B5           | QDSM                      | N                                        | 198                              | 65                             | 0.169                                  |
| B6           | LLLI                      | N                                        | 223                              | 32                             | 0.152                                  |
| C1           | MKVS                      | N                                        | 189                              | 23                             | 0.159                                  |
| C2           | MDHL                      | N                                        | 134                              | 13                             | 0.111                                  |
| C3           | VTCC                      | SH                                       | 167                              | 64                             | 0.148                                  |
| C4           | ALLC                      | SH                                       | 79                               | 23                             | 0.002                                  |

**Supplementary Table S4.** Alignment of CCTV filtered by *mus musculus*.

| Sequence ID                    | Start | End   | Organism            | Protein                                                        |
|--------------------------------|-------|-------|---------------------|----------------------------------------------------------------|
| <a href="#">NP_038658.2</a>    | 3,273 | 3,276 | <i>Mus musculus</i> | polycystin-1 precursor                                         |
| <a href="#">NP_076055.3</a>    | 1,533 | 1,536 | <i>Mus musculus</i> | mucin-2 precursor                                              |
| <a href="#">NP_001240786.1</a> | 1,641 | 1,644 | <i>Mus musculus</i> | methylcytosine dioxygenase TET1 isoform 1                      |
| <a href="#">NP_082290.2</a>    | 1,000 | 1,003 | <i>Mus musculus</i> | transmembrane protein 94                                       |
| <a href="#">NP_001116066.2</a> | 978   | 981   | <i>Mus musculus</i> | PH domain leucine-rich repeat-containing protein phosphatase 2 |
| <a href="#">NP_001076811.1</a> | 553   | 556   | <i>Mus musculus</i> | protein dispatched homolog 3                                   |
| <a href="#">NP_001074813.2</a> | 400   | 403   | <i>Mus musculus</i> | syntaxin-binding protein 5                                     |
| <a href="#">NP_780465.4</a>    | 971   | 974   | <i>Mus musculus</i> | protein HEG homolog 1 precursor                                |
| <a href="#">NP_666151.3</a>    | 642   | 645   | <i>Mus musculus</i> | WD repeat-containing protein 60                                |
| <a href="#">NP_899006.1</a>    | 174   | 177   | <i>Mus musculus</i> | G protein-regulated inducer of neurite outgrowth 3             |
| <a href="#">NP_941052.1</a>    | 340   | 343   | <i>Mus musculus</i> | solute carrier family 22 member 20                             |
| <a href="#">NP_032568.3</a>    | 123   | 126   | <i>Mus musculus</i> | mothers against decapentaplegic homolog 6                      |
| <a href="#">NP_033332.1</a>    | 72    | 75    | <i>Mus musculus</i> | synaptotagmin-1 isoform 1                                      |
| <a href="#">NP_001239271.1</a> | 72    | 75    | <i>Mus musculus</i> | synaptotagmin-1 isoform 2                                      |
| <a href="#">NP_032132.1</a>    | 220   | 223   | <i>Mus musculus</i> | medium-wave-sensitive opsin 1                                  |
| <a href="#">NP_796007.1</a>    | 18    | 21    | <i>Mus musculus</i> | brorin precursor                                               |
| <a href="#">NP_666413.1</a>    | 143   | 146   | <i>Mus musculus</i> | olfactory receptor 1475                                        |
| <a href="#">NP_997015.2</a>    | 143   | 146   | <i>Mus musculus</i> | olfactory receptor 1471                                        |
| <a href="#">NP_666901.2</a>    | 143   | 146   | <i>Mus musculus</i> | olfactory receptor 1472                                        |
| <a href="#">NP_071297.1</a>    | 148   | 151   | <i>Mus musculus</i> | fructosamine-3-kinase isoform a                                |
| <a href="#">NP_852085.2</a>    | 148   | 151   | <i>Mus musculus</i> | ketosamine-3-kinase                                            |
| <a href="#">NP_001033788.1</a> | 148   | 151   | <i>Mus musculus</i> | fructosamine-3-kinase isoform b                                |
| <a href="#">NP_061262.1</a>    | 94    | 97    | <i>Mus musculus</i> | spermatid-specific linker histone H1-like protein              |
| <a href="#">NP_035461.2</a>    | 31    | 34    | <i>Mus musculus</i> | <b>C-C motif chemokine 12 precursor</b>                        |
| <a href="#">NP_067418.1</a>    | 30    | 33    | <i>Mus musculus</i> | <b>C-C motif chemokine 8 precursor</b>                         |

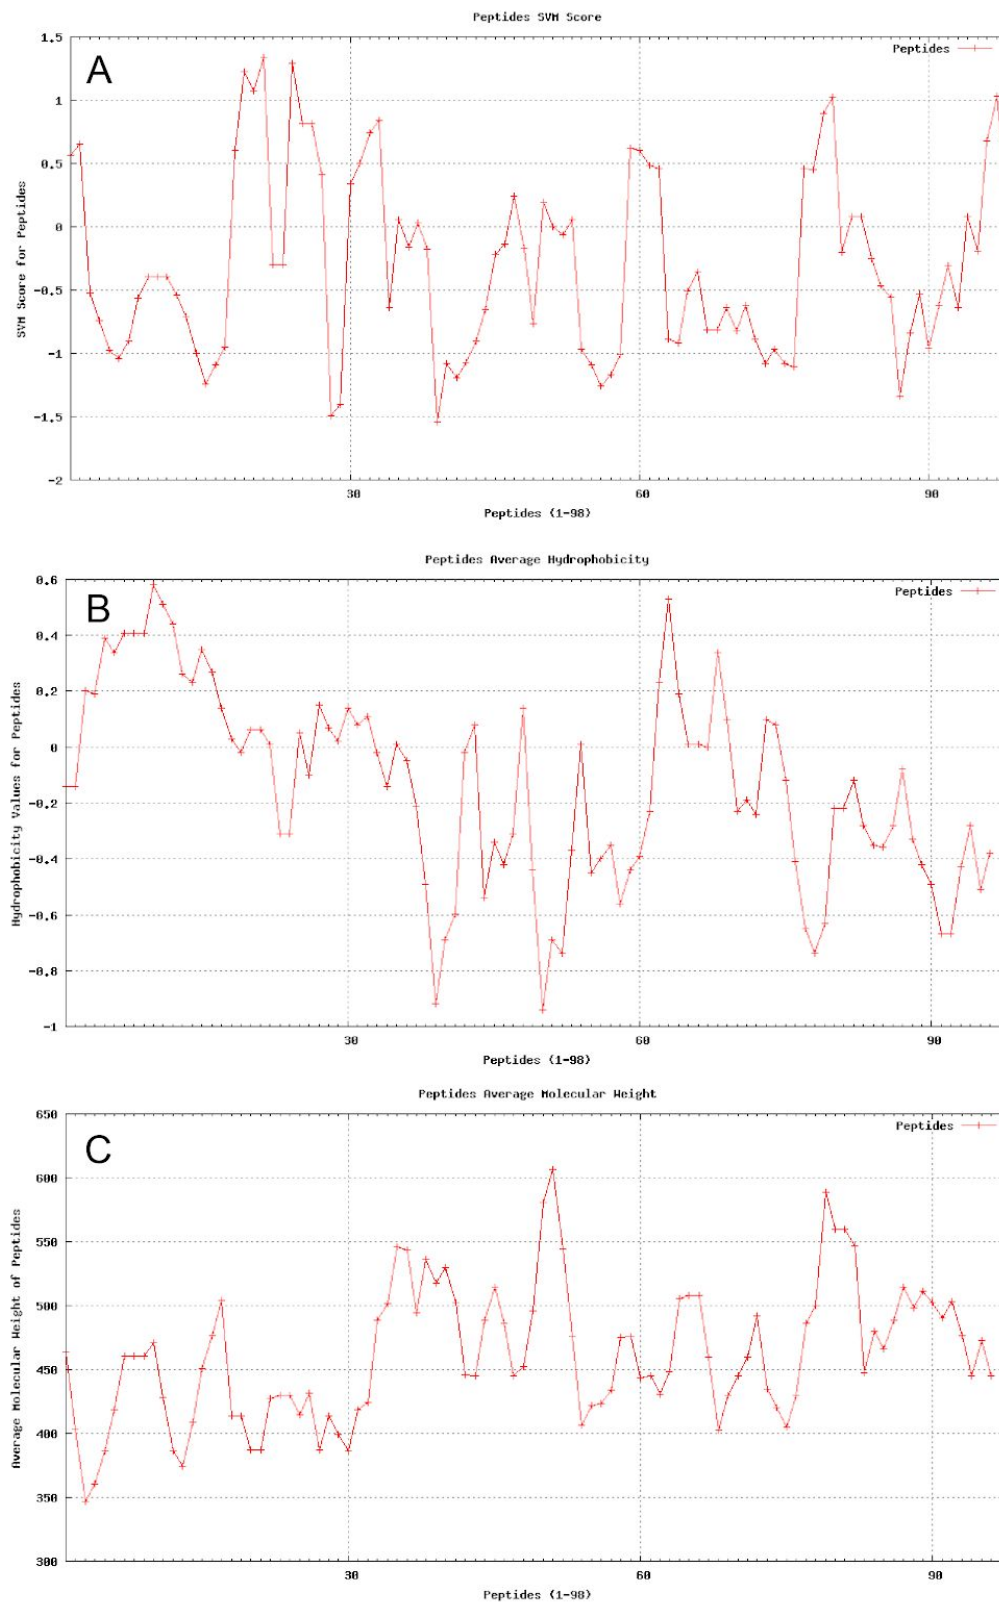

**Supplementary Figure S1.** Peptides and their characteristics predicted via Support Vector Machine (SVM) and the publicly available tool <http://crdd.osdd.net/raghava/ahtpin>. A) SVM scores for predicted peptides, B) Average hydrophobicity of predicted peptides, C) Average molecular weight of predicted peptides.

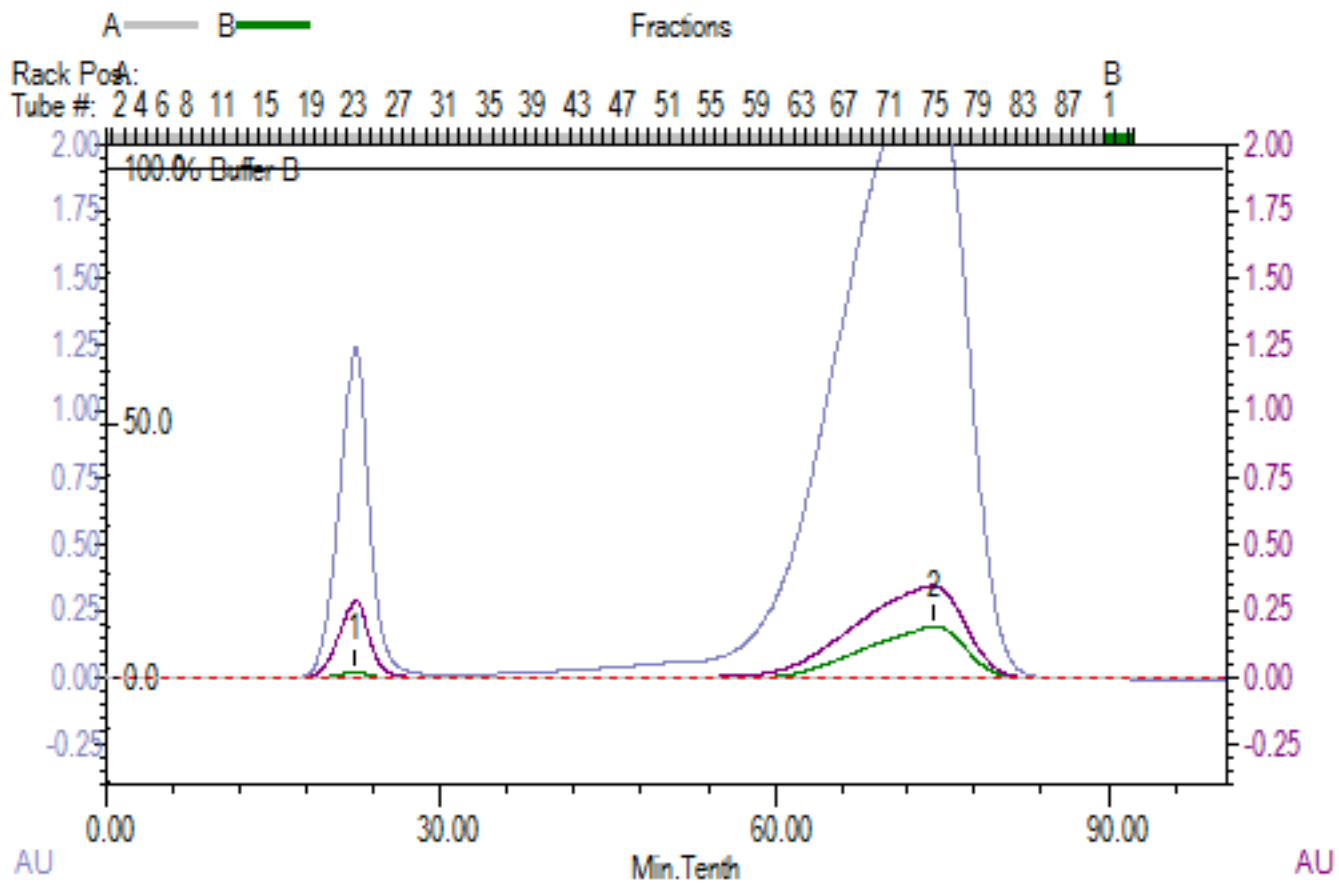

**Supplementary Figure S2.** Gel filtration purification of obtained nanoparticles. Fractions 15-31 (peak 1) were collected for further processing. Chromatogram traces of different colors represent different UV wavelengths of the detector.



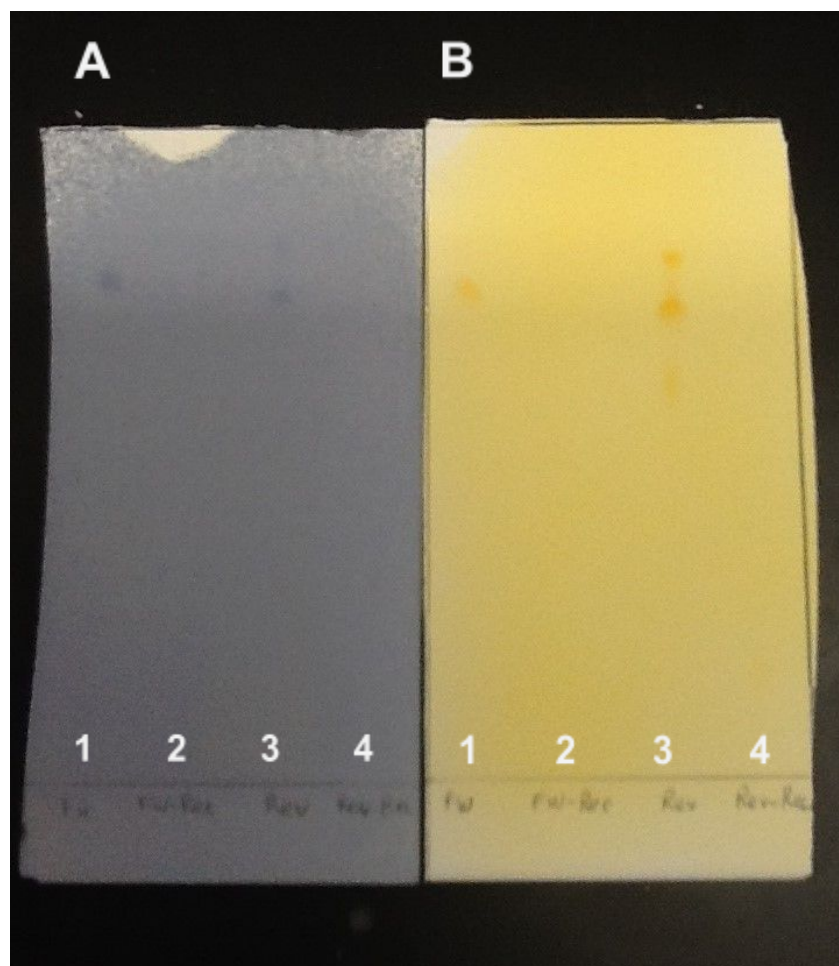

**Supplementary Figure S3.** TLC of obtained conjugation products. A) Molybdenum blue staining phosphates; B) Dragendorff reagent staining amines. 1: N-terminus CCTV conjugation; 2: reaction residue; 3: CCTV SH-conjugation; 4: reaction residue.

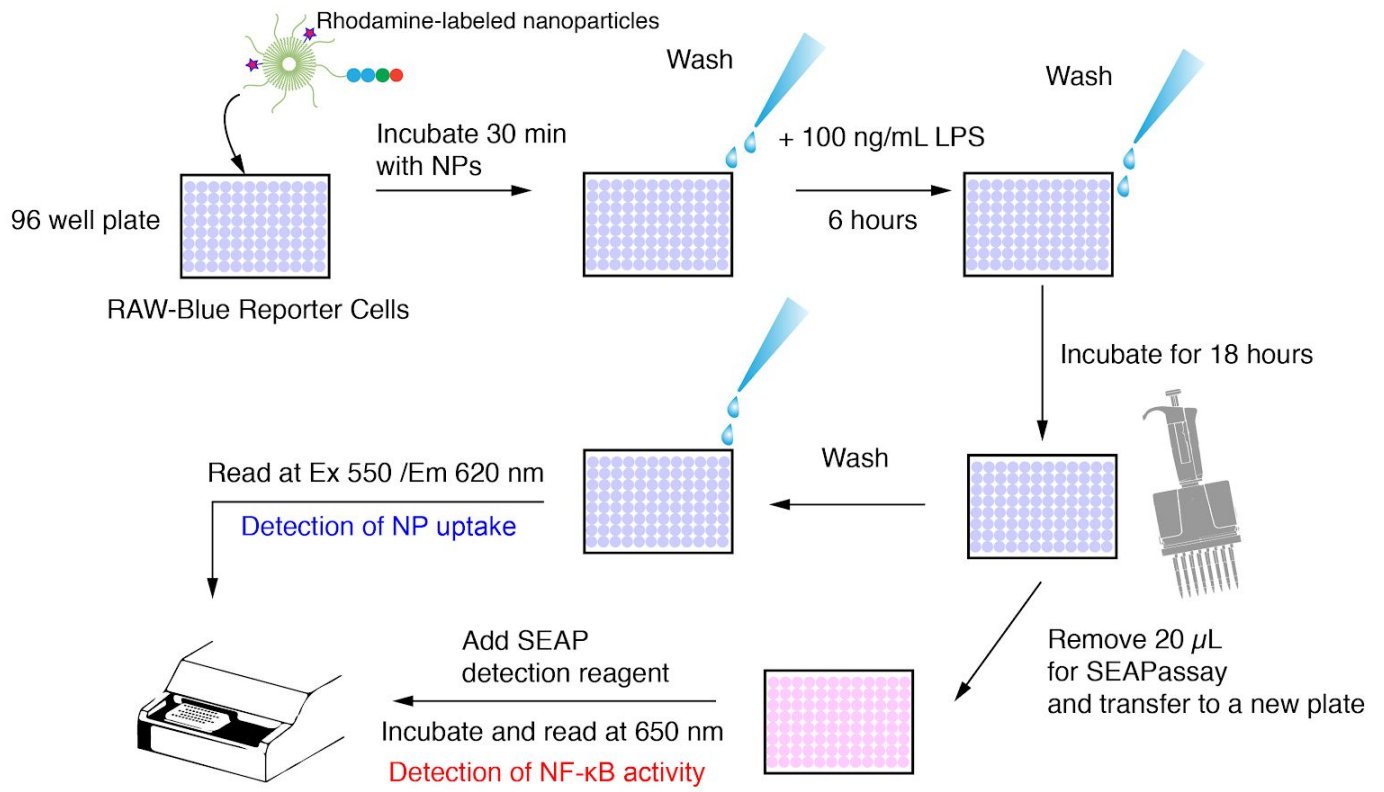

**Supplementary Figure S4.** Schematic representation of screening.

## Mouse alignment

|             |    |         |                                                                           |    |                     |
|-------------|----|---------|---------------------------------------------------------------------------|----|---------------------|
| NP 035461.2 | 31 | V T C C | C:C motif chemokine 12 precursor<br>C:C motif chemokine 12<br>SCY         | 34 | <i>Mus musculus</i> |
|             |    |         | putative receptor binding site                                            |    |                     |
| NP 067418.1 | 30 | V T C C | C:C motif chemokine 8 precursor<br>C:C motif chemokine 8<br>Chemokine: CC | 33 | <i>Mus musculus</i> |
|             |    |         | putative receptor binding site                                            |    |                     |

## Human alignment

● Chain B, C-C motif chemokine 2 [Homo sapiens]

● Chain A, Monocyte Chemoattractant Protein 1, P-Form [Homo sapiens]

● Chain A, Solution Structure Of The Monocyte Chemoattractant Protein- 1 Dimer Using Heteron...

● Chain D, Small Inducible Cytokine A2 [Homo sapiens]

● Chain M, C-C motif chemokine 2 [Homo sapiens]

● Chain D, Small Inducible Cytokine [Homo sapiens]

● CCTV

```

>pdb|4ZK9|B
-QPDAINAPVTCCYNFTNRKISVQRLASYRRITSSKCPKEAVIFKTIVAKEICADPKQKW
VQDSMDHLDKQTQTPKTHHHHHHHH
>pdb|1DOK|A
MQPDAINAPVTCCYNFTNRKISVQRLASYRRITSSKCPKEAVIFKTIVAKEICADPKQKW
VQDSMDHLDKQTQTPKT-----
>pdb|1DOM|A
-QPDAINAPVTCCYNFTNRKISVQRLASYRRITSSKCPKEAVIFKTIVAKEICADPKQKW
VQDSMDHLDKQTQTPKT-----
>pdb|2NZ1|D
-QPDAINAPVTCCYNFTNRKISVQRLASYRRITSSKCPKEAVIFKTIVAKEICADPKQKW
VQDSIDHLDKQTQTPKT-----
>pdb|4DN4|M
-QPDAINAAVTCCYNFTNRKISVQRLASYRRITSSKCPKEAVIFKTIVAKEICADPKQKW
VQDSMDHLDKQTQTPKT-----
>pdb|1ML0|D
-QPDAINAAVTCCYNFTNRKISVQRLASYRRITSSKCPKEAVIFKTIVAKEICADPKQKW
VQDSIDHLDKQTQTPKT-----

```

**Supplementary Figure S5.** FASTA alignment of the CCTV sequence using a constraint-based multiple alignment tool (<https://www.ncbi.nlm.nih.gov/tools/cobalt/>) demonstrated alignment of CCTV with putative receptor binding sites in CC motif chemokine 12 and 8 in mouse sequences and with CC motif chemokine 2 in human sequences.

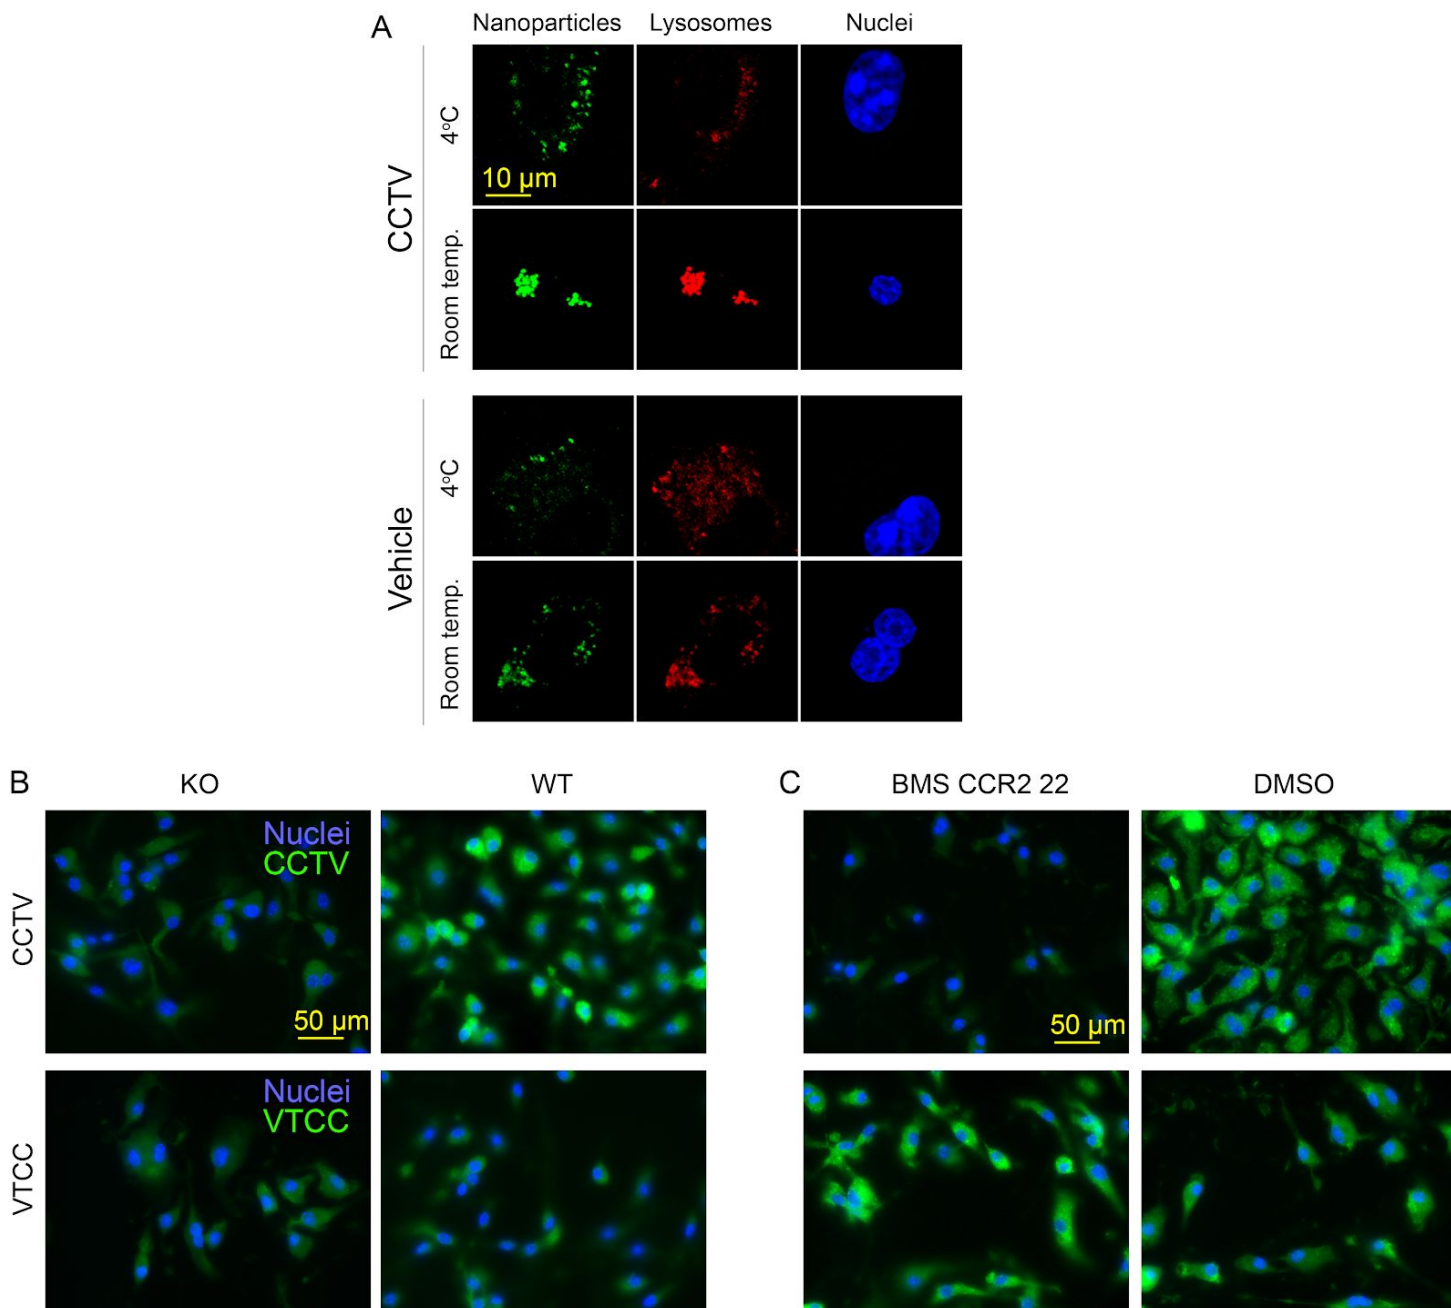

**Supplementary Figure S6. A)** Separate channels for main manuscript Figure 1B.

Uptake of carboxyfluorescein-labeled CCTV or VTCC in cultured bone marrow derived macrophages from **B)** CCR2 knockout (KO, B6.129S4-Ccr2<sup>tm1lf/J</sup>) or wild-type (WT) mice; **C)** wild-type mouse-derived macrophages pre-treated (6 h) with CCR2 inhibitor BMS CCR2 22 (10 nM) or DMSO as vehicle control. **C)**

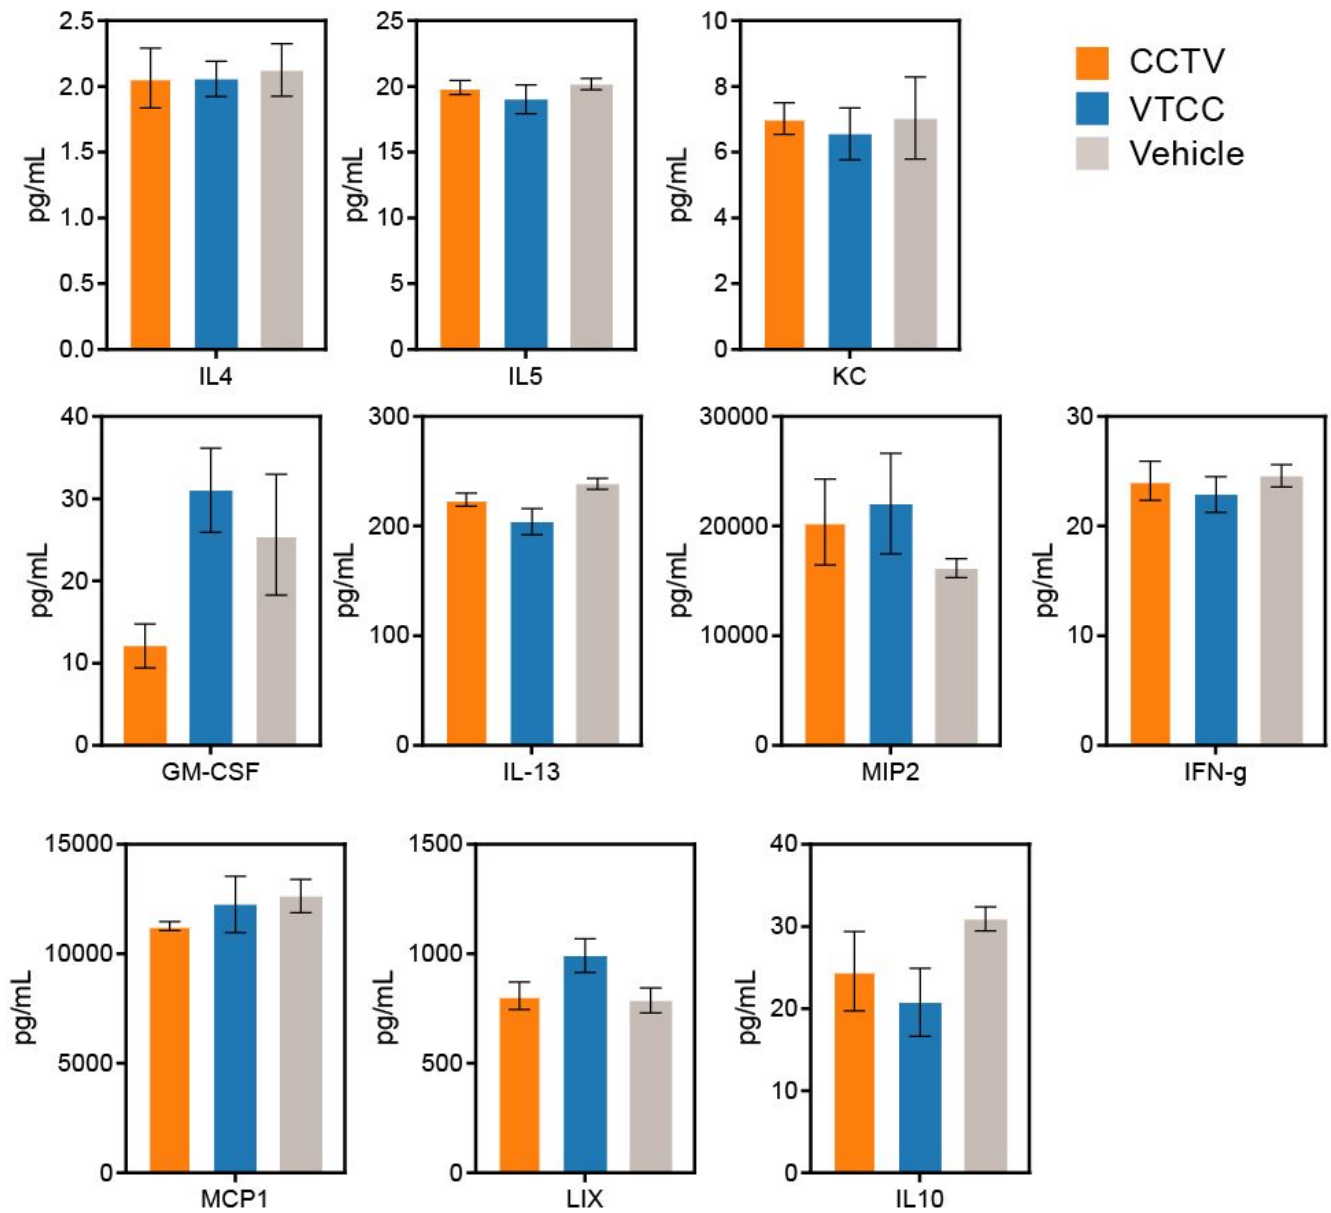

**Supplementary Figure S7.** Cytokines in supernatants from RAW cells stimulated with lipopolysaccharide (100 ng/mL) and treated with CCTV, VTCC or vehicle nanoparticles.

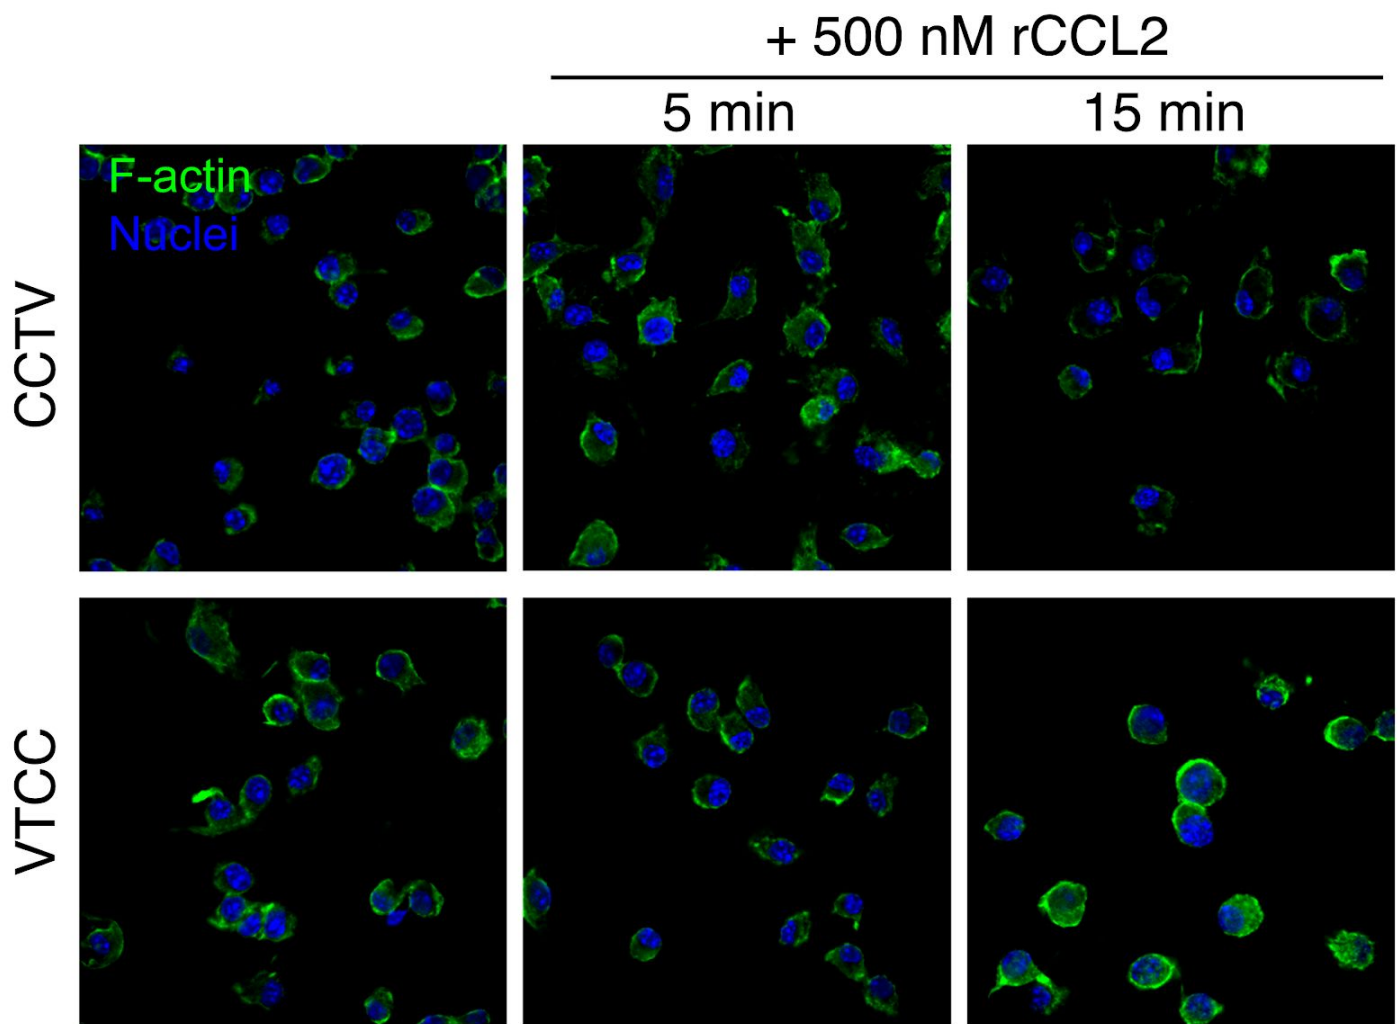

**Supplementary Figure S8.** Actin polymerization assays in bone marrow derived monocytes isolated from CCR2 knockout mice (B6.129S4-*Ccr2*<sup>tm1lf<sub>c</sub></sup>/J). The experiments were performed as described in Methods and main text. Green: phalloidin staining of actin, blue: nuclei stained with Hoechst 33342.

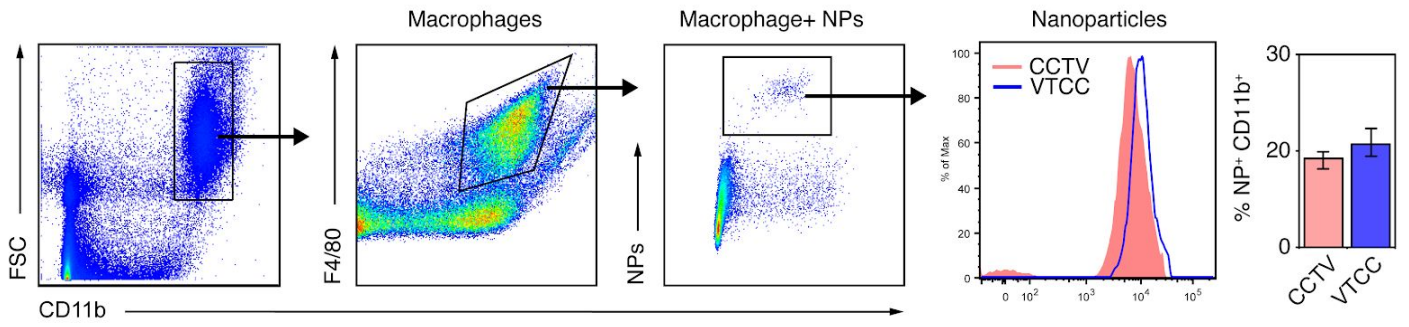

**Supplementary Figure S9.** Flow cytometry analysis of total macrophage-specific accumulation of CCTV or VTCC in blood of *Apoe*<sup>-/-</sup> nanoparticle injected mice. The percent of macrophages that engulfed either nanoparticle was the same. Total blood macrophages were identified as F4/80 positive and CD11b positive.

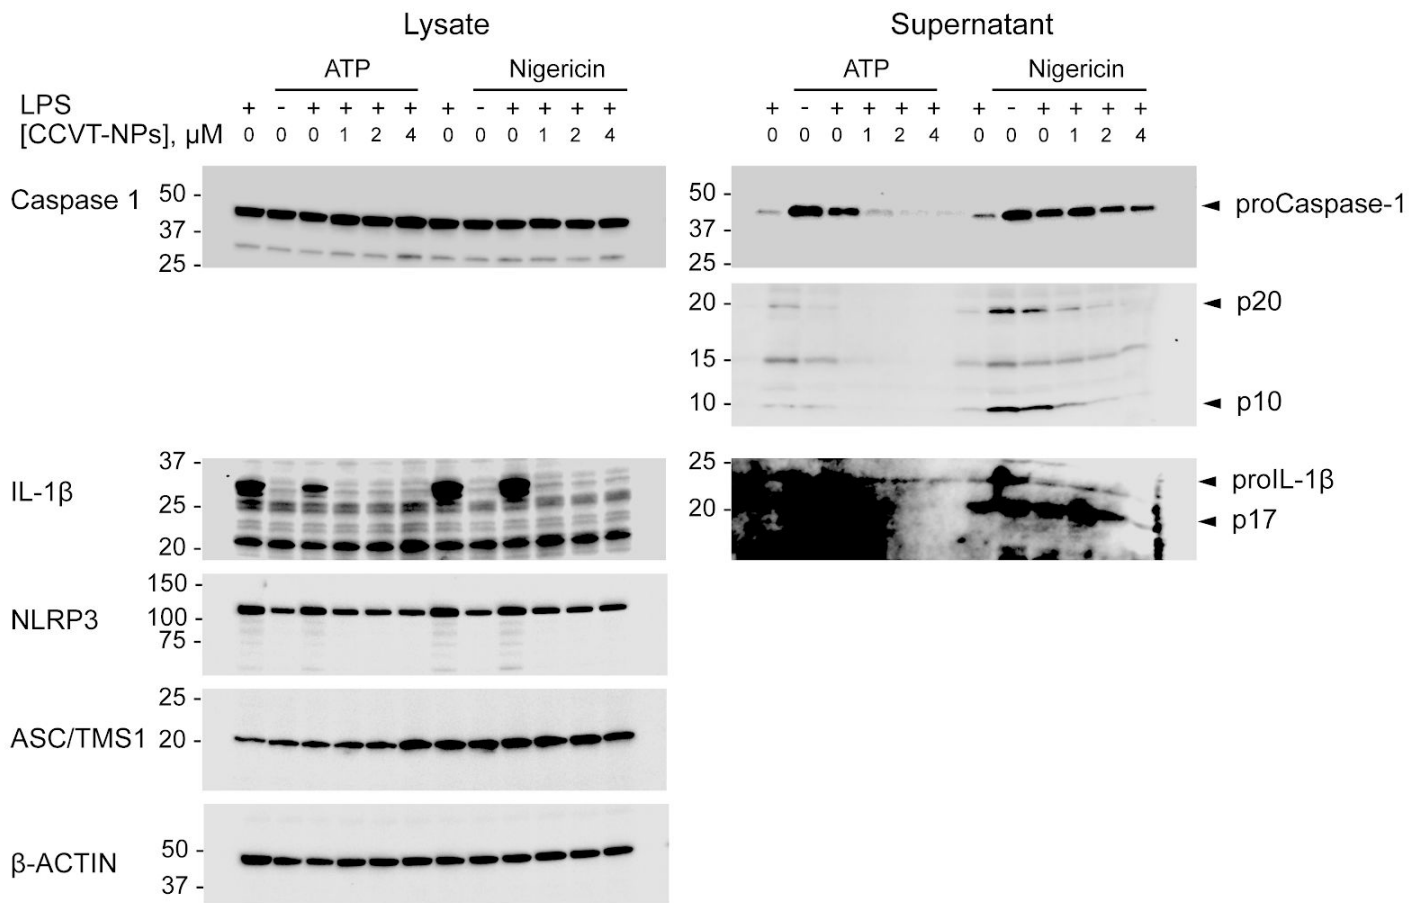

**Supplementary Figure S10.** Inflammasome activation assays in J774 cells. The cells were treated as described in Methods and main text Figure 5 legend, plus additional inflammasome activator ATP that was added at 1 mM. Immunoblot was performed as described in methods.
